# Supplementary material for: Characteristics of Dogs with Biofilm‐Forming Escherichia Coli Urinary Tract Infections
Source: PubMed Central journal article supplement — J Vet Intern Med. 2018 Aug 7;32(5):1645–51. doi: 10.1111/jvim.15231 (PMC6189388; doi:10.1111/jvim.15231), 2018-08-07
Supplement: JVIM-32-1645-s001.pdf [file JVIM-32-1645-s001.pdf]

| Group               | Total     | MDR             | Pyuria          | Antibiotic use  | LUTS             | Chronic infection | Uncomplicated infection | Complicated infection | Pyelonephritis |
|---------------------|-----------|-----------------|-----------------|-----------------|------------------|-------------------|-------------------------|-----------------------|----------------|
| <b>All samples</b>  | <b>78</b> | <b>45 (58%)</b> | <b>42 (54%)</b> | <b>36 (46%)</b> | <b>26 (33%)</b>  | <b>34 (44%)</b>   | <b>9 (12%)</b>          | <b>63 (81%)</b>       | <b>5 (6%)</b>  |
| <i>BF+</i>          | 41        | 14 (34%)*       | 23 (56%)        | 16 (39%)        | 14 (34%)         | 15 (37%)          | 6 (15%)                 | 34 (83%)              | 1 (2%)         |
| <i>BF-</i>          | 37        | 31 (84%)*       | 19 (51%)        | 20 (54%)        | 12 (32%)         | 19 (51%)          | 3 (8%)                  | 29 (78%)              | 4 (11%)        |
| <b>Chronic</b>      | <b>34</b> | <b>21 (62%)</b> | <b>18 (53%)</b> | <b>26 (76%)</b> | <b>13 (38%)</b>  | <b>34 (100%)</b>  | <b>3 (9%)</b>           | <b>28 (82%)</b>       | <b>3 (9%)</b>  |
| <i>BF+</i>          | 15        | 5 (33%)*        | 9 (60%)         | 12 (80%)        | 6 (40%)          | 15 (100%)         | 2 (13%)                 | 12 (80%)              | 1 (7%)         |
| <i>BF-</i>          | 19        | 16 (84%)*       | 9 (47%)         | 14 (74%)        | 7 (37%)          | 19 (100%)         | 1 (5%)                  | 16 (84%)              | 2 (11%)        |
| <b>Symptomatic</b>  | <b>26</b> | <b>16 (62%)</b> | <b>15 (58%)</b> | <b>14 (54%)</b> | <b>26 (100%)</b> | <b>13 (50%)</b>   | <b>5 (19%)</b>          | <b>21 (81%)</b>       | <b>0 (0%)</b>  |
| <i>BF+</i>          | 14        | 5 (36%)         | 6 (43%)         | 6 (43%)         | 14 (100%)        | 6 (43%)           | 3 (21%)                 | 11 (79%)              | 0 (0%)         |
| <i>BF-</i>          | 12        | 11 (92%)        | 9 (75%)         | 8 (67%)         | 12 (100%)        | 7 (58%)           | 2 (17%)                 | 10 (83%)              | 0 (0%)         |
| <b>Asymptomatic</b> | <b>40</b> | <b>22 (55%)</b> | <b>26 (65%)</b> | <b>18 (45%)</b> | <b>0 (0%)</b>    | <b>16 (40%)</b>   | <b>4 (10%)</b>          | <b>31 (78%)</b>       | <b>5 (12%)</b> |
| <i>BF+</i>          | 23        | 6 (26%)*        | 17 (74%)        | 9 (39%)         | 0 (0%)           | 8 (35%)           | 3 (13%)                 | 19 (83%)              | 1 (4%)         |
| <i>BF-</i>          | 17        | 16 (94%)*       | 9 (53%)         | 9 (53%)         | 0 (0%)           | 8 (47%)           | 1 (6%)                  | 12 (71%)              | 4 (24%)        |
