# Supplementary material for: Characteristics of Dogs with Biofilm‐Forming Escherichia Coli Urinary Tract Infections
Source: PubMed Central journal article supplement — J Vet Intern Med. 2018 Aug 7;32(5):1645–51. doi: 10.1111/jvim.15231 (PMC6189388; doi:10.1111/jvim.15231), 2018-08-07
Supplement: JVIM-32-1645-s002.pdf [file JVIM-32-1645-s002.pdf]

| <b>Symptomatic (n = 26)</b> |            | <b>Mean</b> | <b>SD</b> | <b>Median</b> | <b>Q1</b> | <b>Q3</b> | <b>p</b> |
|-----------------------------|------------|-------------|-----------|---------------|-----------|-----------|----------|
| <b>Age (y)</b>              | <i>BF+</i> | 8.89        | 3.79      |               |           |           | 0.50     |
|                             | <i>BF-</i> | 9.88        | 3.69      |               |           |           |          |
| <b>BCS</b>                  | <i>BF+</i> |             |           | 5.00          | 4.00      | 5.00      | 0.06     |
|                             | <i>BF-</i> |             |           | 6.50          | 4.75      | 7.00      |          |
| <b>Weight (kg)</b>          | <i>BF+</i> | 23.88       | 14.91     |               |           |           | 0.92     |
|                             | <i>BF-</i> | 23.31       | 13.29     |               |           |           |          |

| <b>Sex</b> | <b>BF+</b> | <b>BF-</b> | <b>p</b> |
|------------|------------|------------|----------|
| <b>MI</b>  | 0          | 0          |          |
| <b>MC</b>  | 4          | 1          |          |
| <b>FI</b>  | 1          | 0          |          |
| <b>FS</b>  | 9          | 11         | 0.23     |
