# Supplementary material for: Characteristics of Dogs with Biofilm‐Forming Escherichia Coli Urinary Tract Infections
Source: PubMed Central journal article supplement — J Vet Intern Med. 2018 Aug 7;32(5):1645–51. doi: 10.1111/jvim.15231 (PMC6189388; doi:10.1111/jvim.15231), 2018-08-07
Supplement: JVIM-32-1645-s003.pdf [file JVIM-32-1645-s003.pdf]

| <b>Asymptomatic (n = 40)</b> |            | <b>Mean</b> | <b>SD</b> | <b>Median</b> | <b>Q1</b> | <b>Q3</b> | <b>p</b> |
|------------------------------|------------|-------------|-----------|---------------|-----------|-----------|----------|
| <b>Age (y)</b>               | <i>BF+</i> | 8.98        | 3.51      |               |           |           | 0.39     |
|                              | <i>BF-</i> | 9.98        | 3.59      |               |           |           |          |
| <b>BCS</b>                   | <i>BF+</i> |             |           | 6.00          | 5.00      | 7.00      | 0.63     |
|                              | <i>BF-</i> |             |           | 6.00          | 4.00      | 6.00      |          |
| <b>Weight (kg)</b>           | <i>BF+</i> |             |           | 23.70         | 11.35     | 33.75     | 0.20     |
|                              | <i>BF-</i> |             |           | 13.80         | 11.35     | 33.75     |          |

| <b>Sex</b> | <b>BF+</b> | <b>BF-</b> | <b>p</b> |
|------------|------------|------------|----------|
| <b>MI</b>  | 1          | 2          | 0.49     |
| <b>MC</b>  | 8          | 3          |          |
| <b>FI</b>  | 1          | 0          |          |
| <b>FS</b>  | 13         | 12         |          |
