# Supplementary material for: Characteristics of Dogs with Biofilm‐Forming Escherichia Coli Urinary Tract Infections
Source: PubMed Central journal article supplement — J Vet Intern Med. 2018 Aug 7;32(5):1645–51. doi: 10.1111/jvim.15231 (PMC6189388; doi:10.1111/jvim.15231), 2018-08-07
Supplement: JVIM-32-1645-s004.pdf [file JVIM-32-1645-s004.pdf]

| <b>Chronic (n = 34)</b> |            | <b>Mean</b> | <b>SD</b> | <b>Median</b> | <b>Q1</b> | <b>Q3</b> | <b>p</b> |
|-------------------------|------------|-------------|-----------|---------------|-----------|-----------|----------|
| <b>Age (y)</b>          | <i>BF+</i> | 8.18        | 3.72      |               |           |           | 0.19     |
|                         | <i>BF-</i> | 9.89        | 3.73      |               |           |           |          |
| <b>BCS</b>              | <i>BF+</i> | 5.53        | 1.55      |               |           |           | 0.57     |
|                         | <i>BF-</i> | 5.22        | 1.56      |               |           |           |          |
| <b>Weight (kg)</b>      | <i>BF+</i> |             |           | 27.10         | 16.25     | 35.25     | 0.15     |
|                         | <i>BF-</i> |             |           | 15.00         | 9.85      | 28.90     |          |

| <b>Sex</b> | <b>BF+</b> | <b>BF-</b> | <b>p</b> |
|------------|------------|------------|----------|
| MI         | 1          | 1          |          |
| MC         | 7          | 3          |          |
| FI         | 2          | 0          |          |
| FS         | 5          | 15         | 0.03     |
